# Supplementary material
Source: Springer Nature journal article supplement (https://www.springermedizin.de/resource/supplementary/12885_2011_2692_MOESM1_ESM.pdf/9461770)

## IL-6

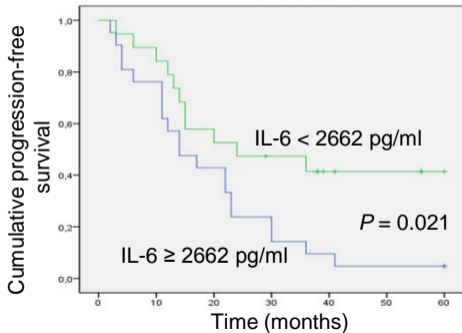

## IL-8

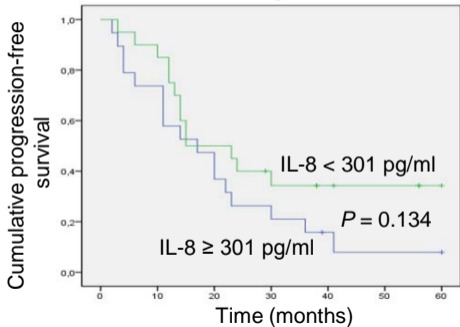

Supplement: MOESM1 [file 9461770]
